# Supplementary material
Source: publisher figshare collection journal article supplement (https://springernature.figshare.com/ndownloader/files/24573287)

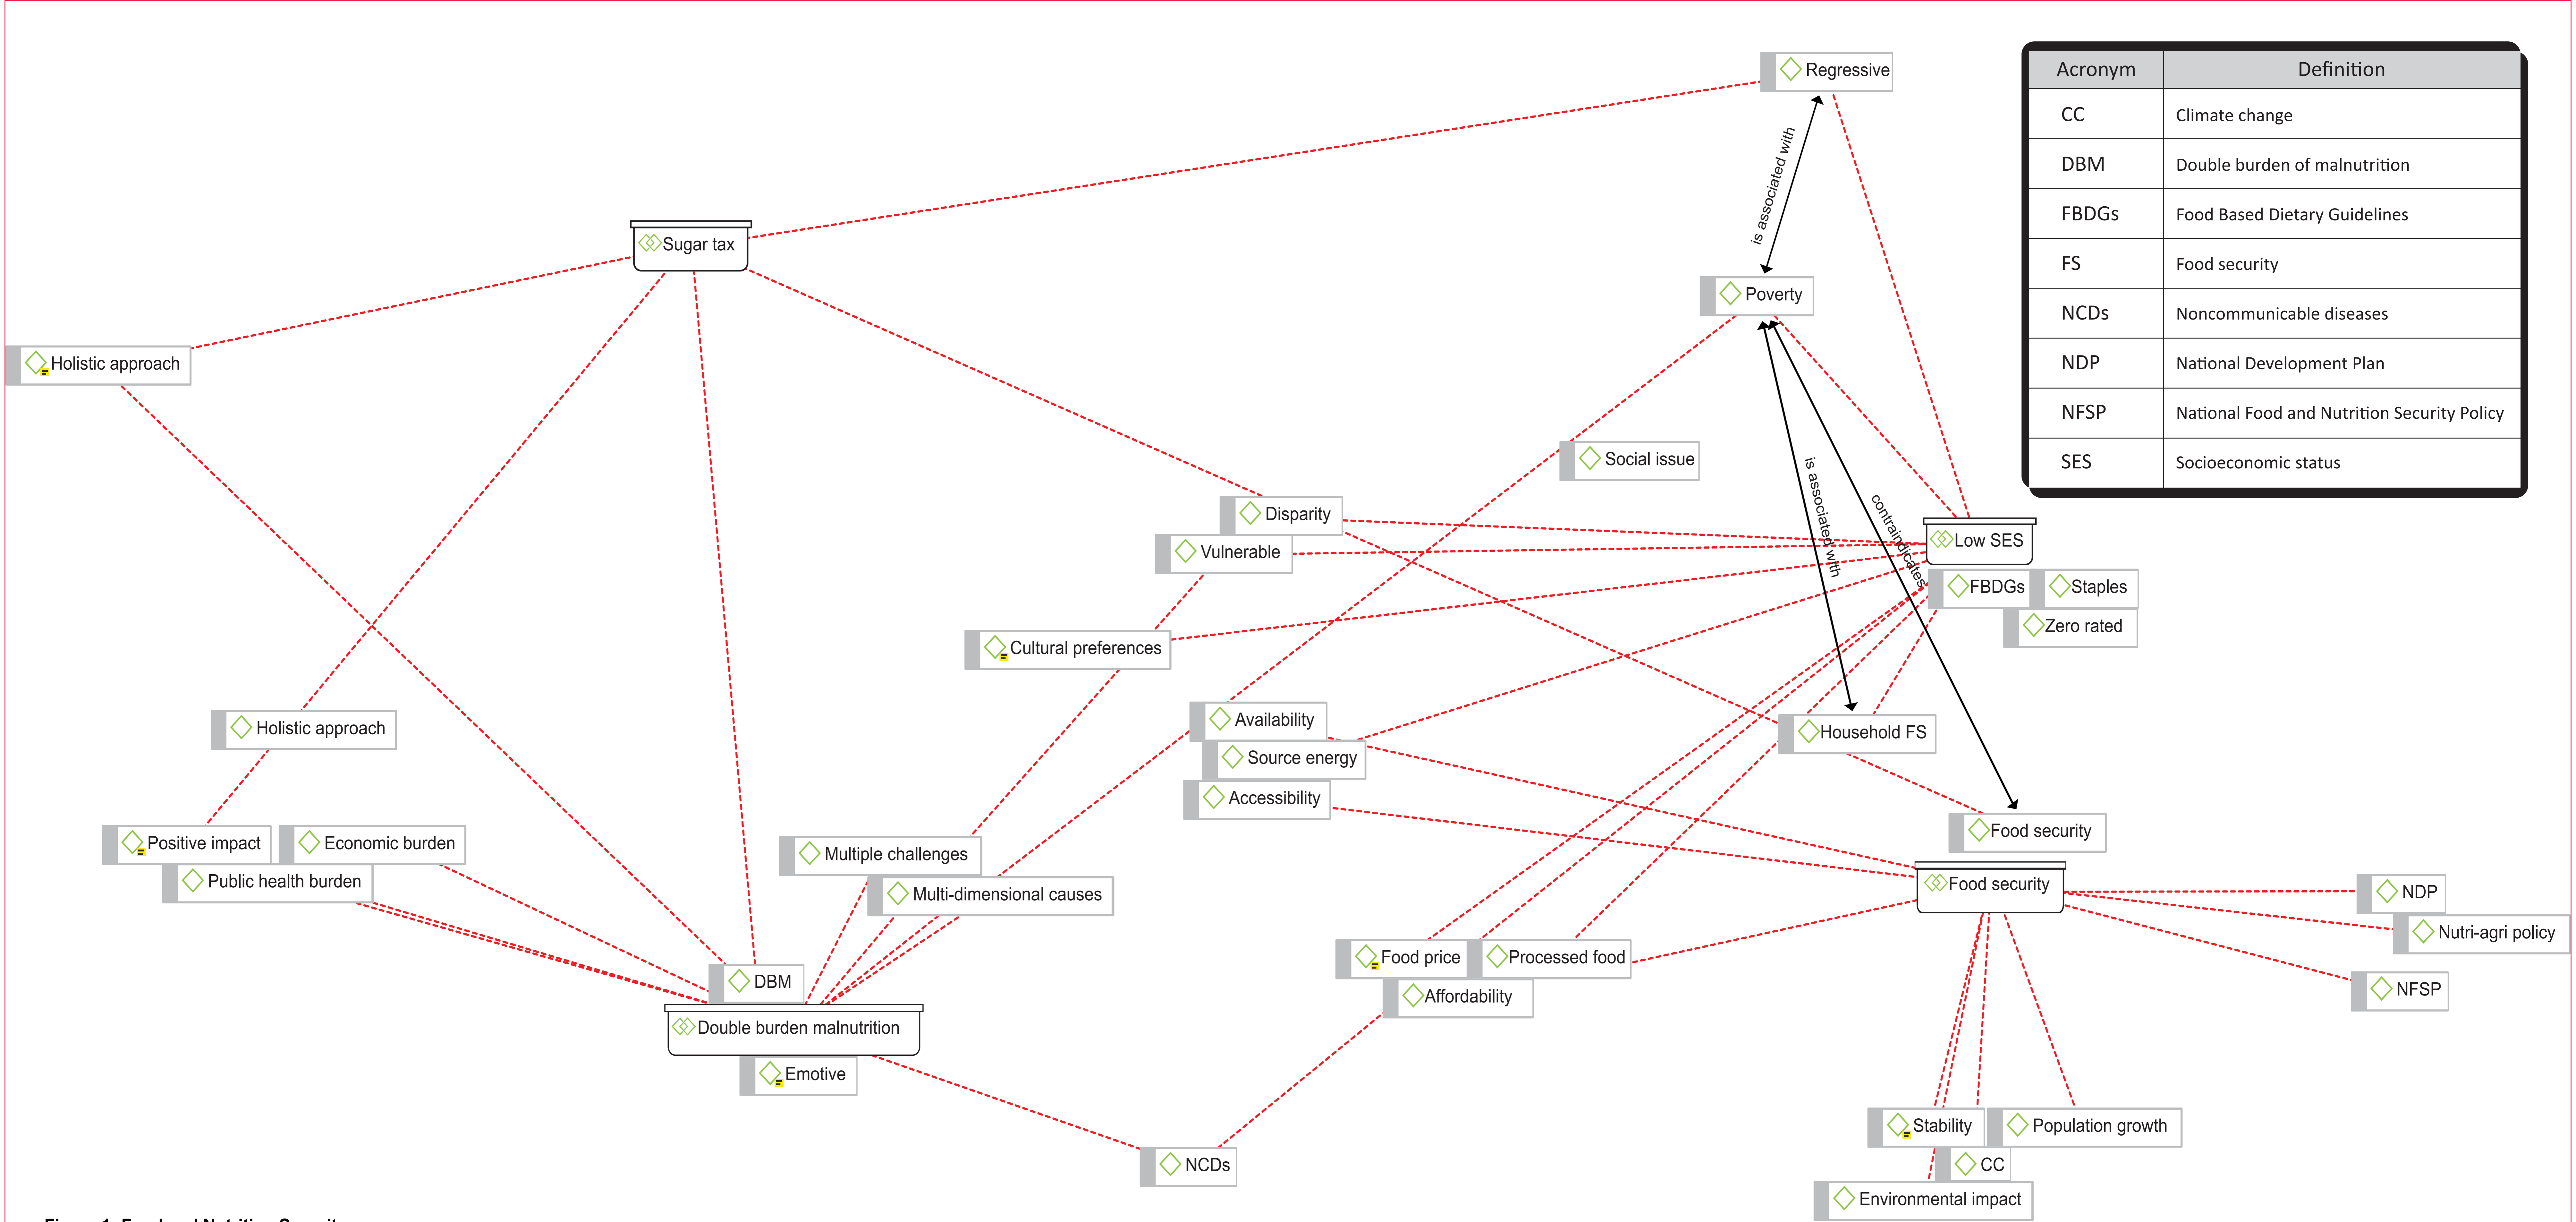

Figure 1: Food and Nutrition Security

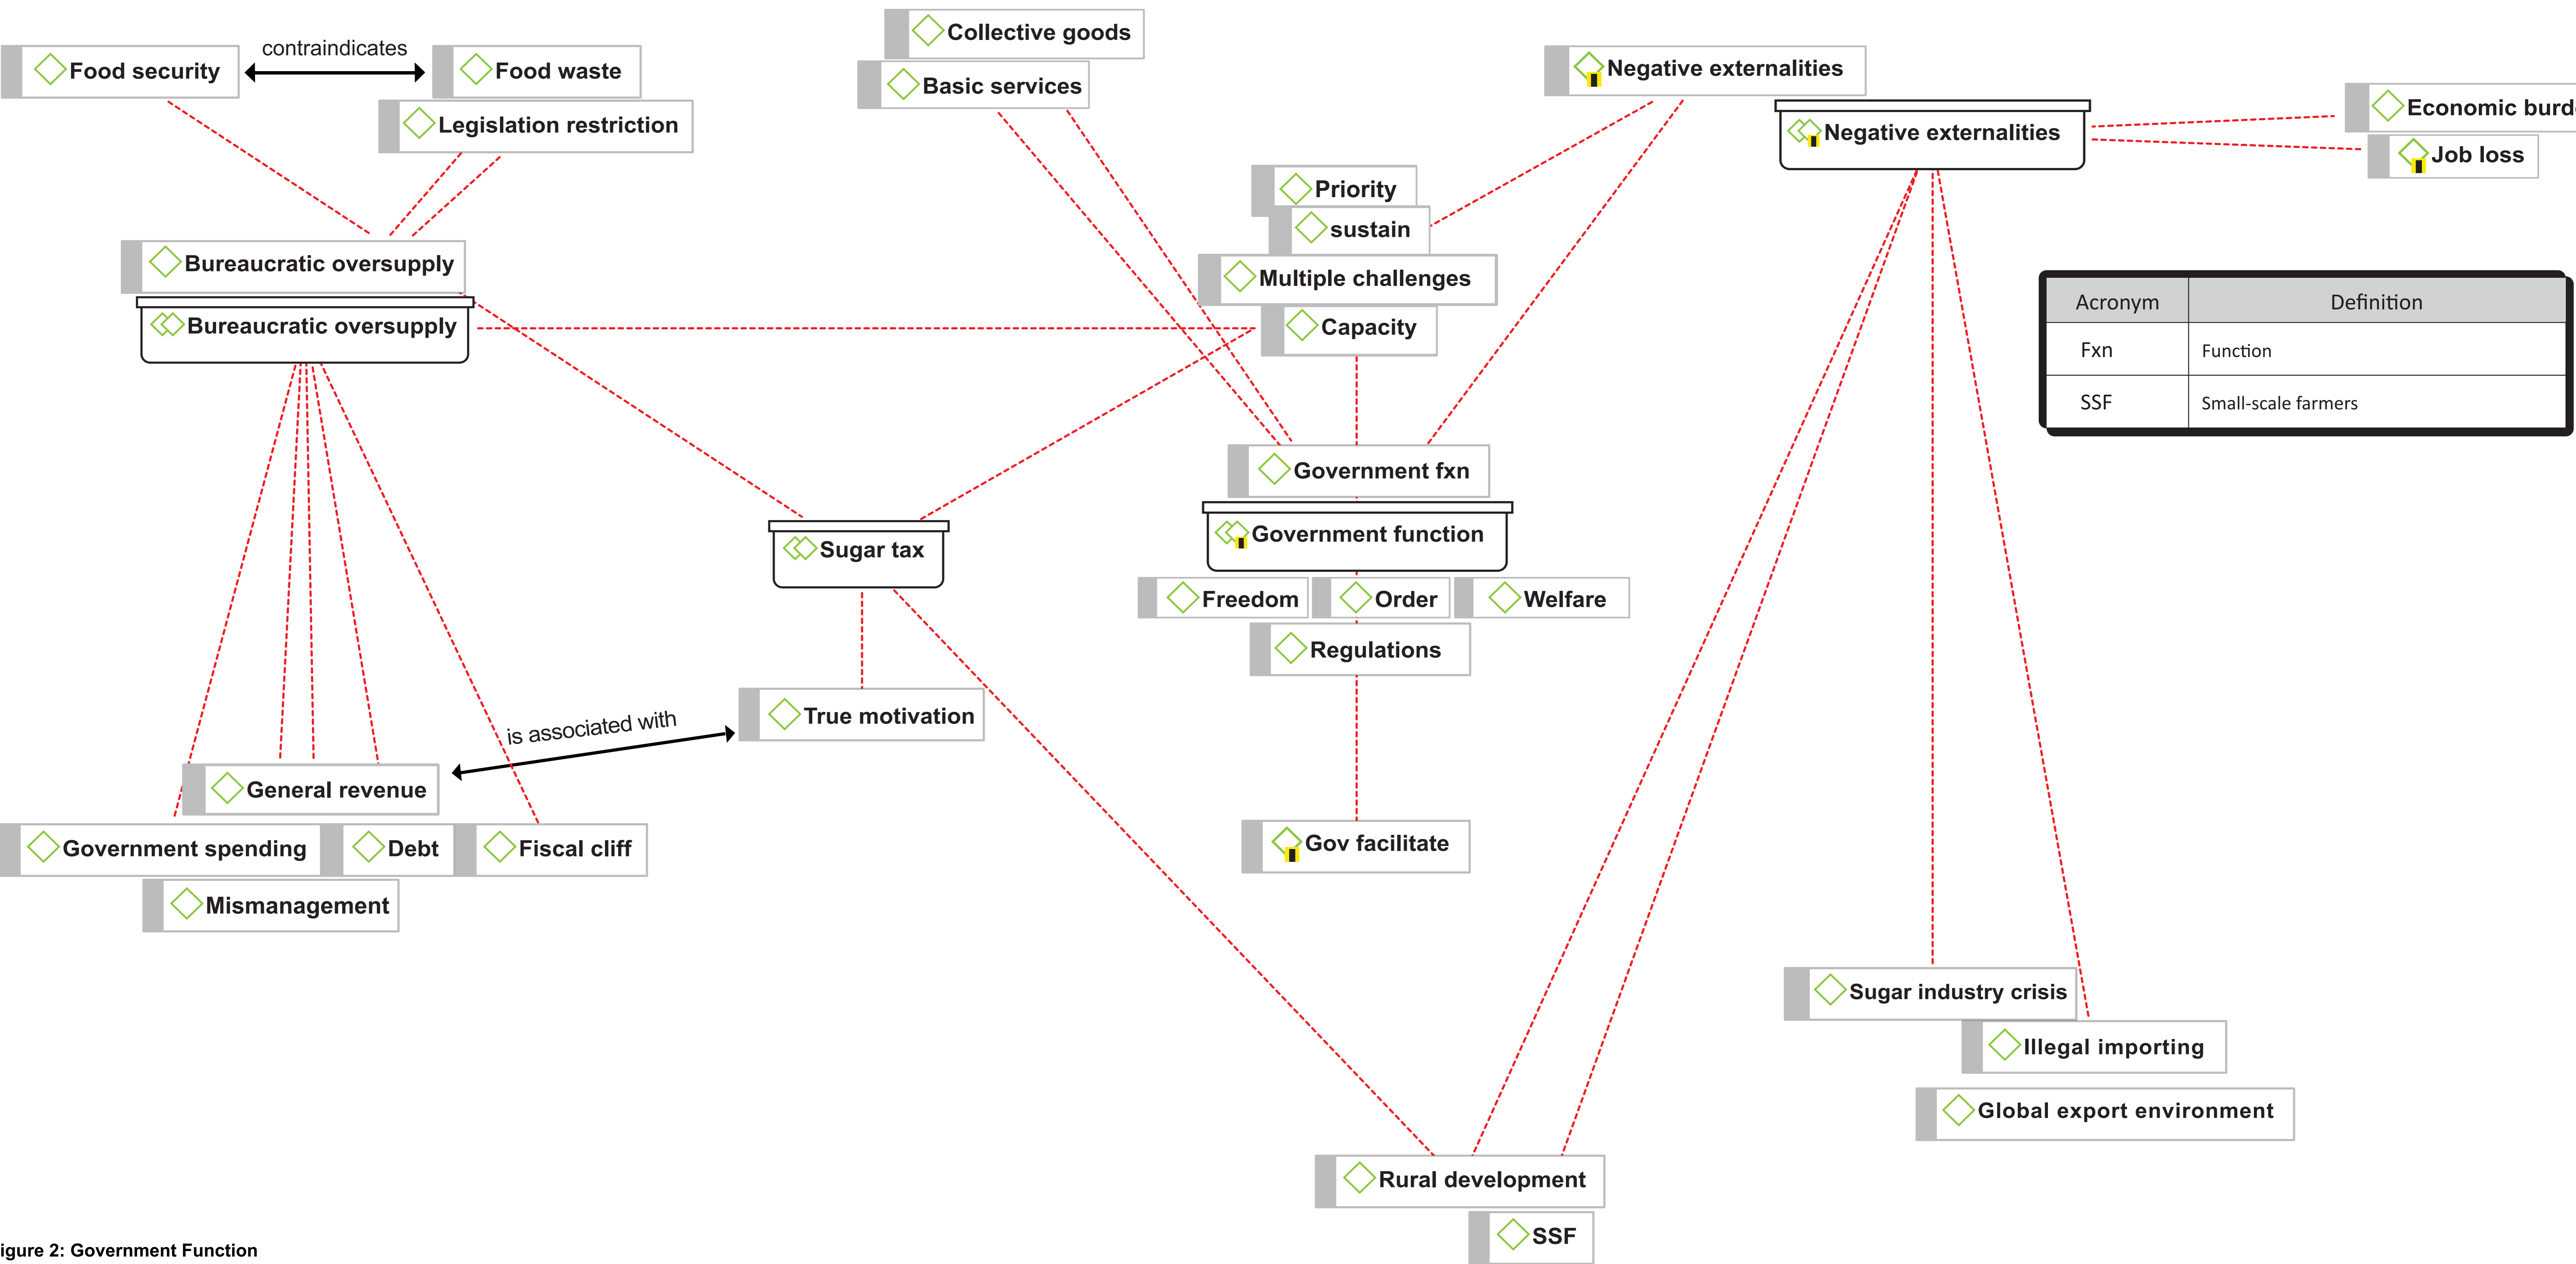

Figure 2: Government Function

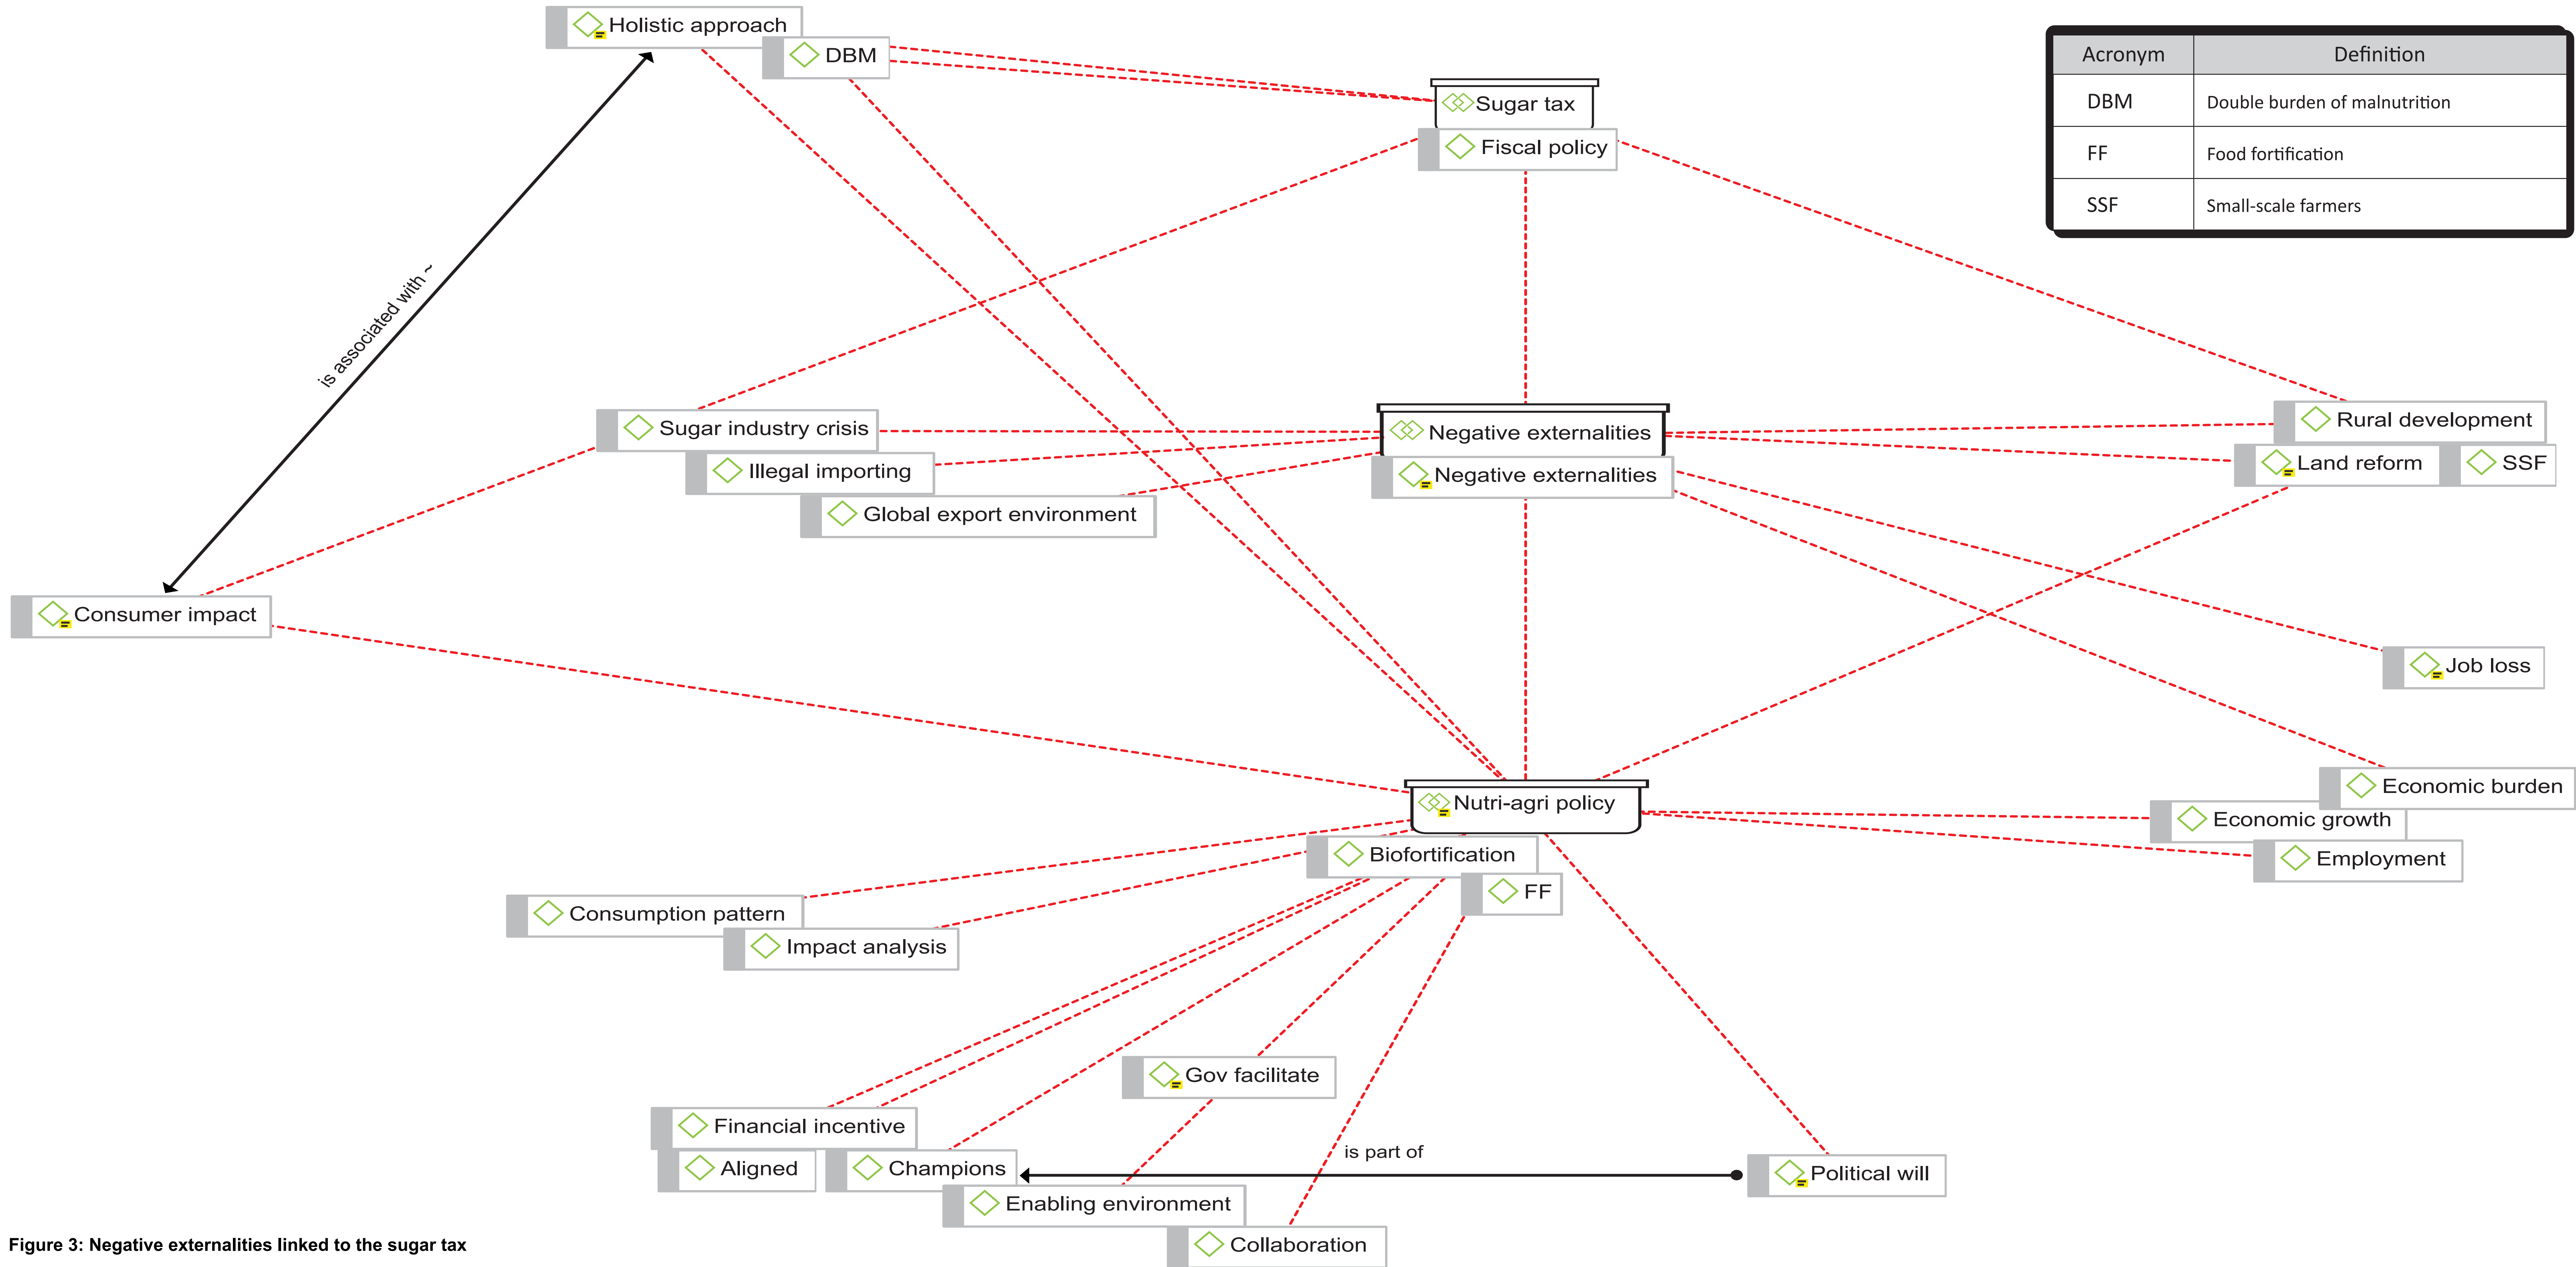

Figure 3: Negative externalities linked to the sugar tax

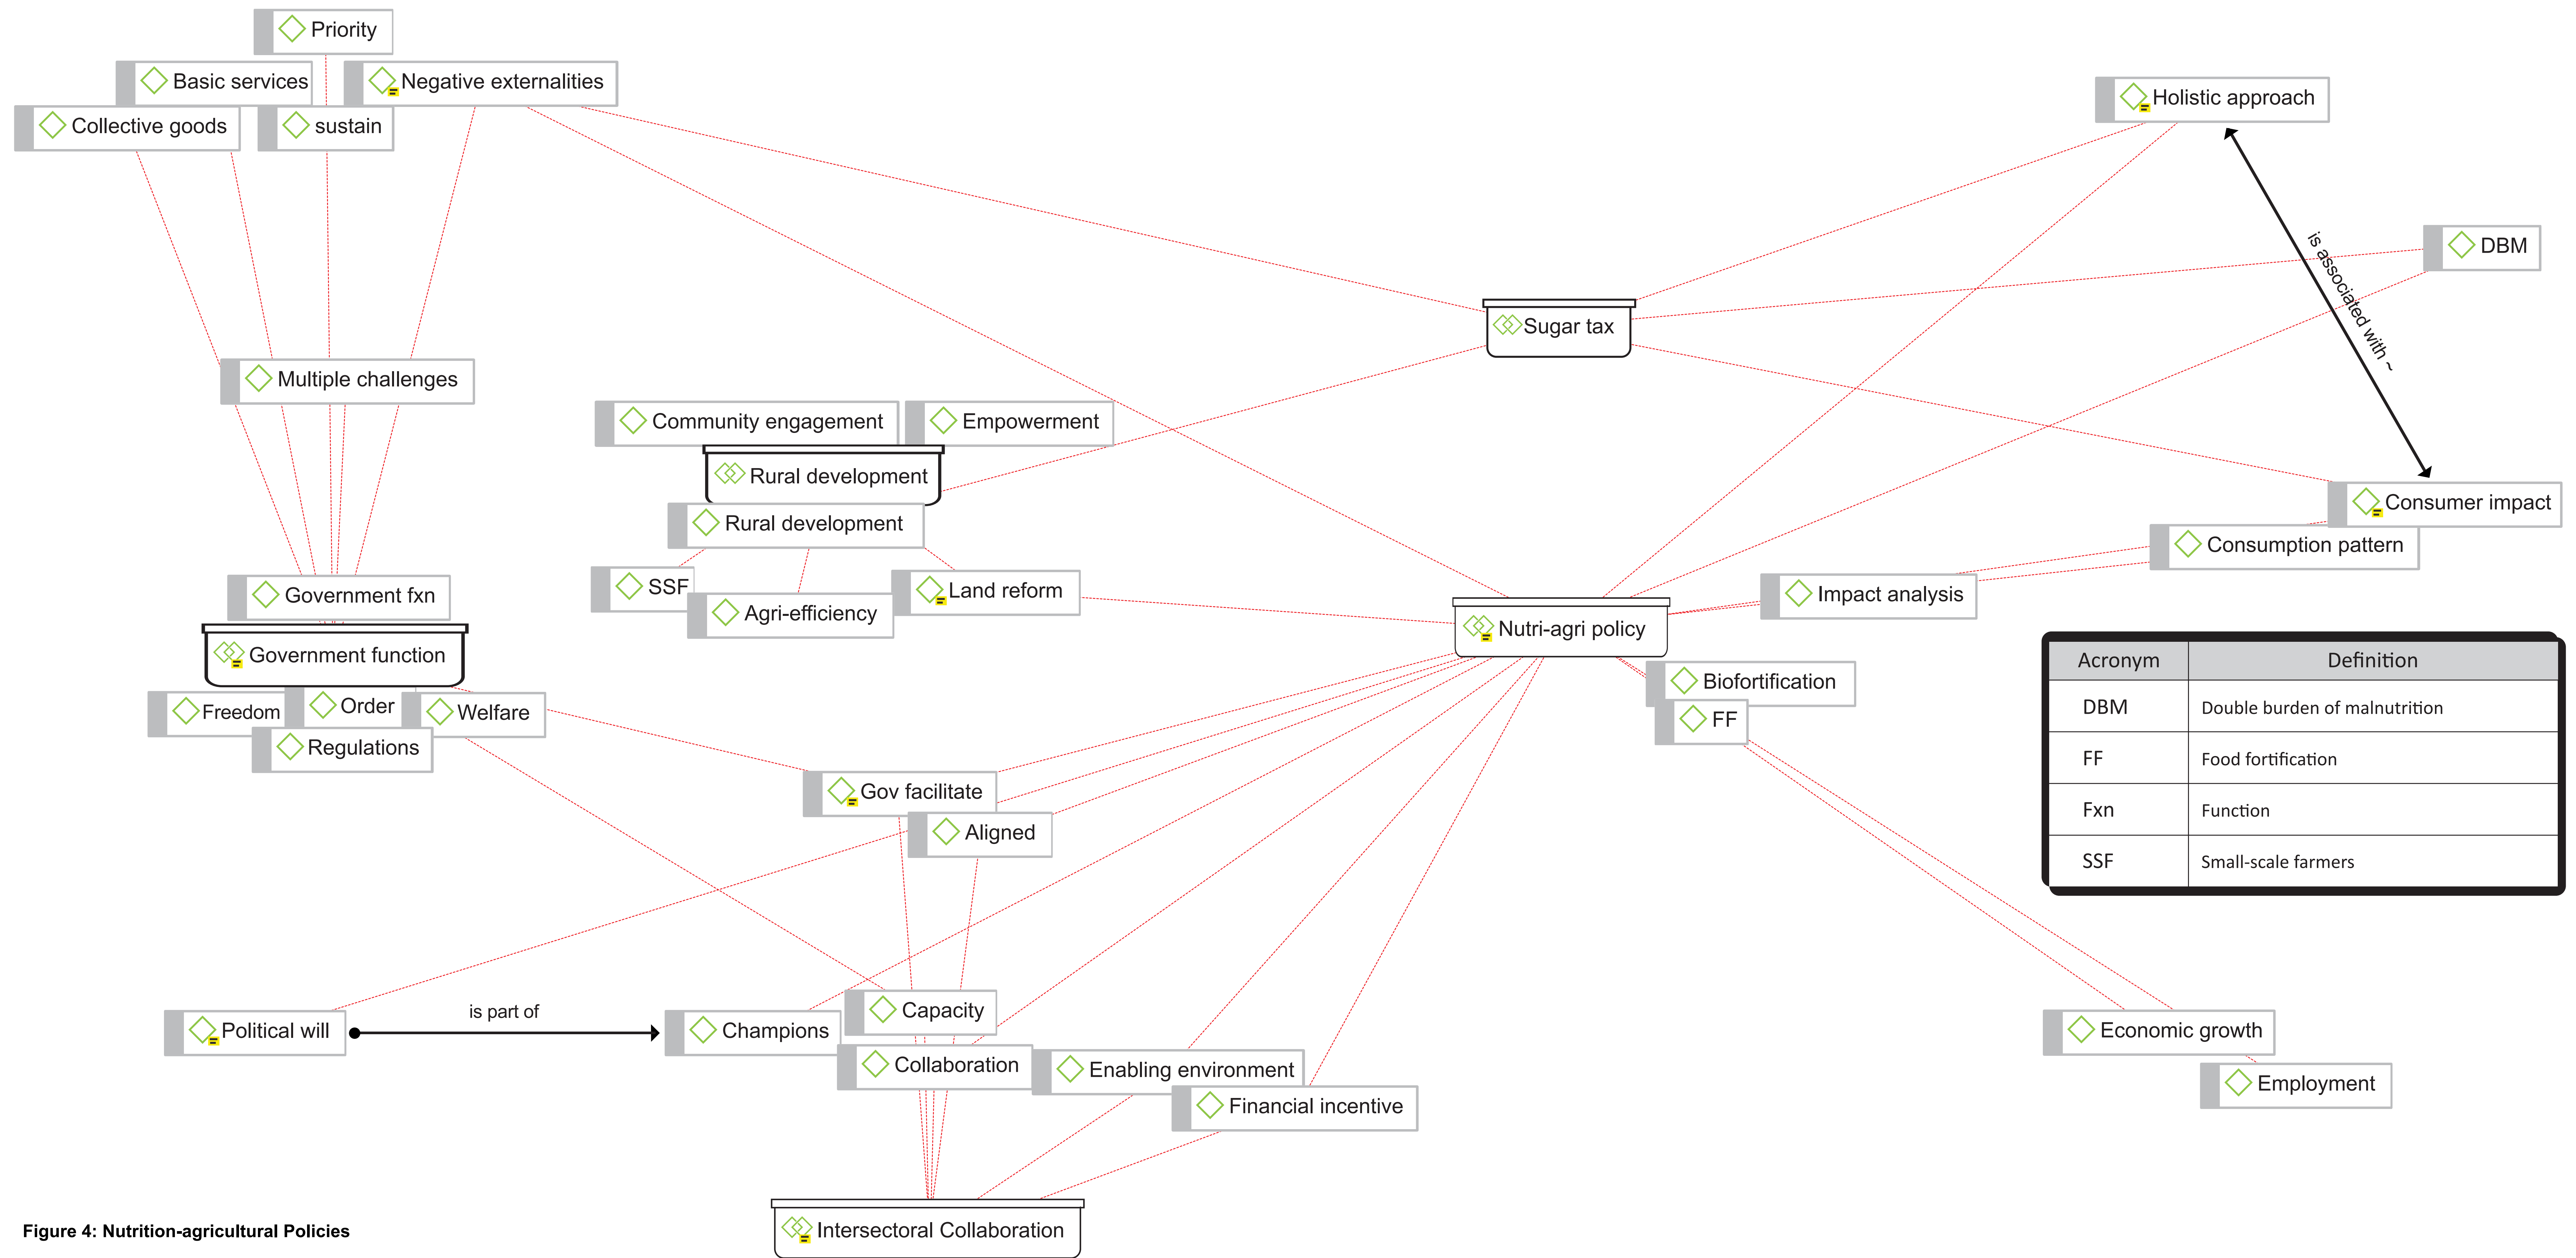

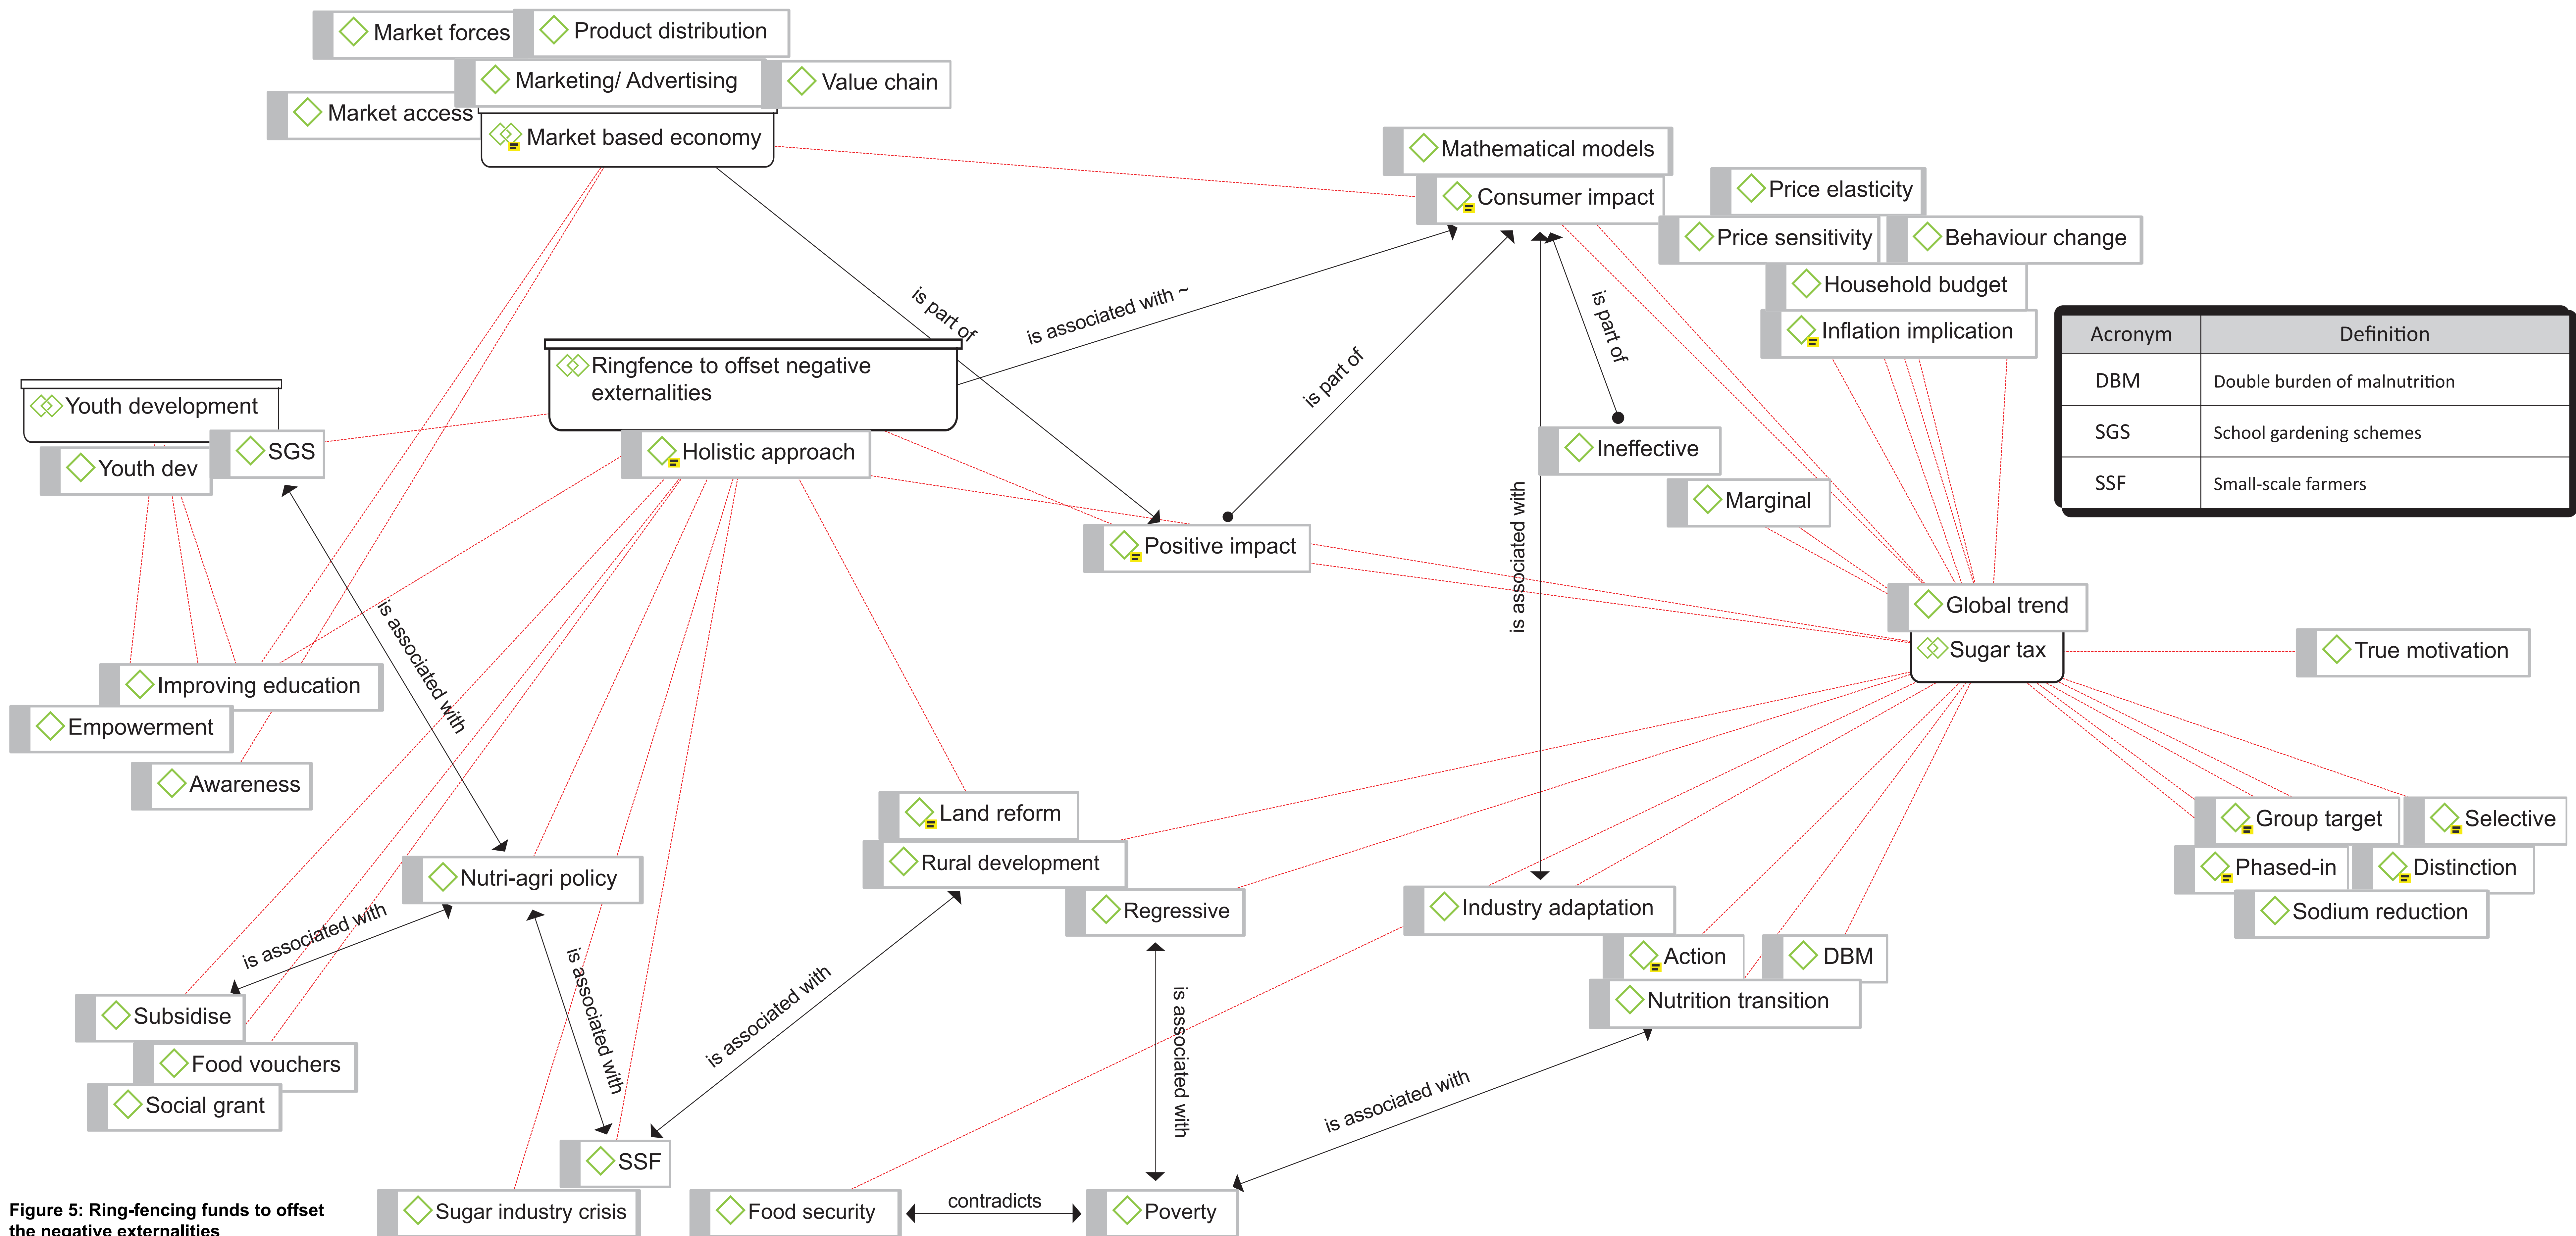

Supplement: Supplementary file [file 24573287]
